# Supplementary material
Source: HighWire-hosted journal article supplement (http://molpharm.aspetjournals.org/highwire/filestream/76907/field_highwire_adjunct_files/0/Supplemental_Figure_1.pdf)
Supplement: Supplemental_Figure_1.pdf [file Supplemental_Figure_1.pdf]

## Supplemental Figure 1

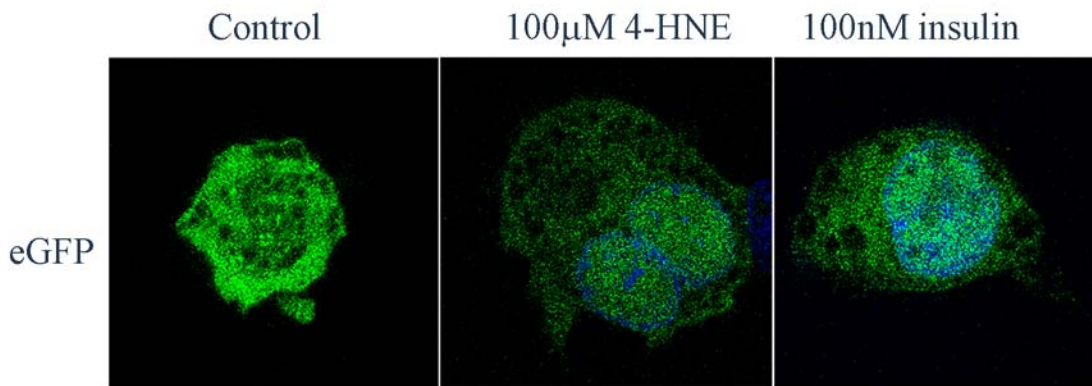

**Shearn C.T. et al., PTEN Inhibition by 4-Hydroxynonenal Leads to Increased Akt Activation in Hepatocytes. Molecular Pharmacology**

**Supplemental Figure 1. Transfection and localization of eGFP in HepG2 cells.** Confocal microscopy of eGFP control vector transfected HepG2 cells stimulated with 100μM 4-HNE (60 min-serum free media) followed by 100nM insulin (15min). (Green=eGFP, Blue= Hoechst 33342 nuclear staining).
